# Supplementary material for: Genomic Diversity Analysis Reveals a Strong Population Structure in Histoplasma capsulatum LAmA (Histoplasma suramericanum)
Source: MDPI journal article supplement (doi:10.3390/jof7100865), 2021-10-15
Supplement: s1 [file s1]

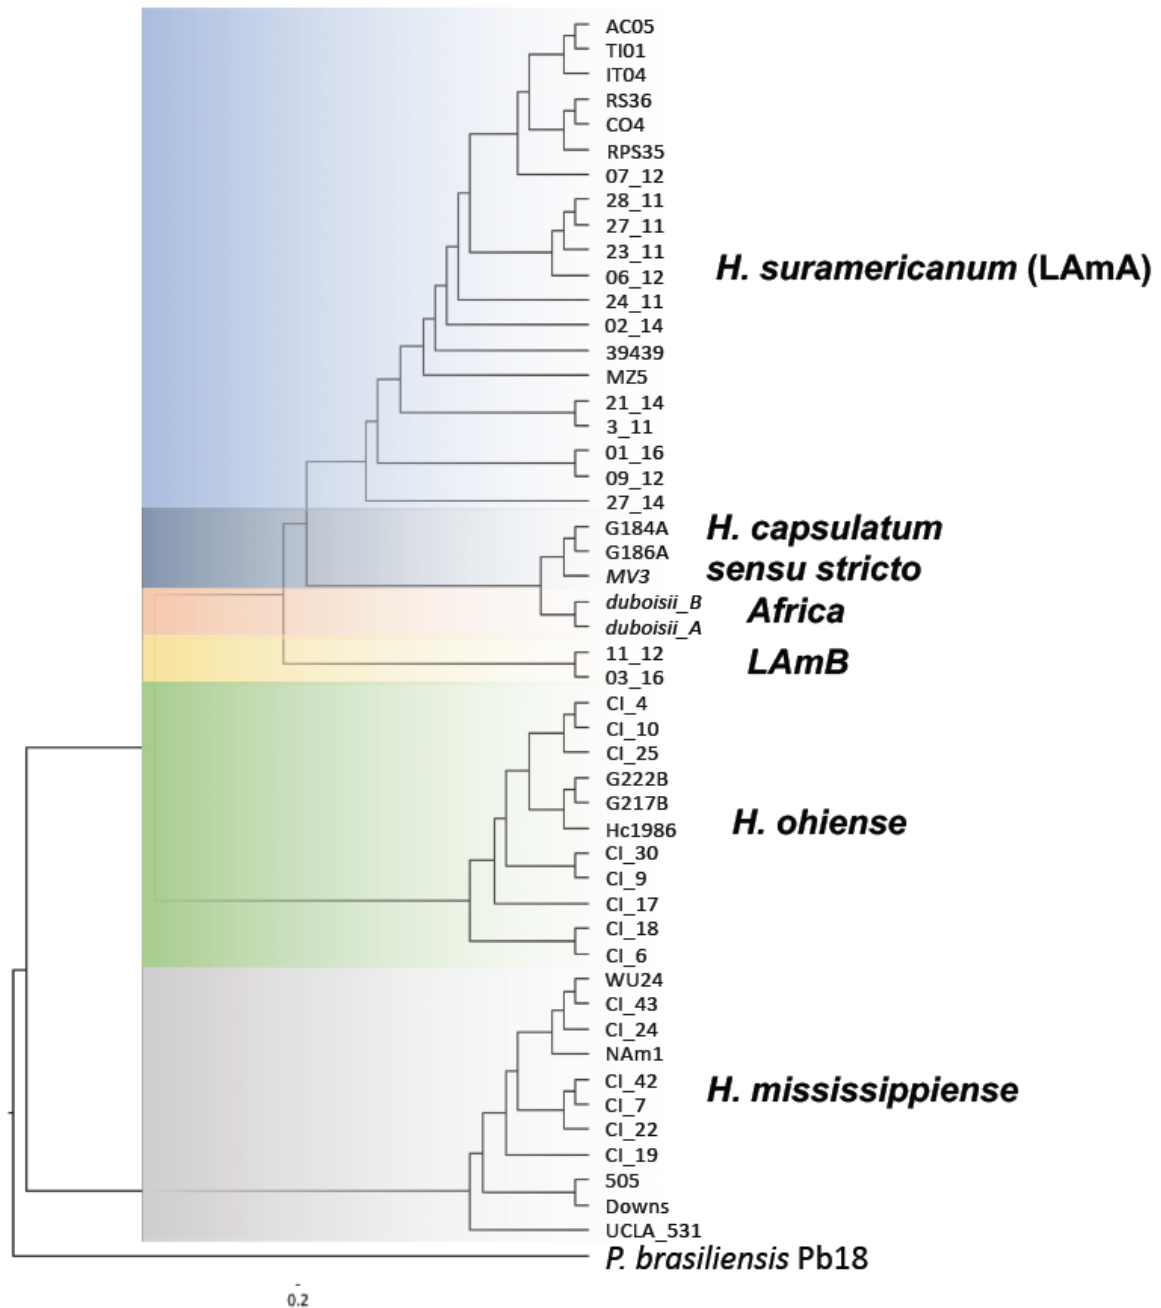

**Figure S1.** Whole-genome Maximum Likelihood tree of *Histoplasma* sp. The phylogenomic tree was rooted with *Paracoccidioides brasiliensis* Pb18 strain. The branches was transformed to proportional and the main clusters of *Histoplasma* are highlighted.
